# Supplementary material for: The Mindfulness-Based Kindness Curriculum for Preschoolers: An Applied Multi-Site Randomized Control Trial
Source: Springer Nature journal article supplement (doi:10.1007/s12671-023-02210-8), 2023-09-01
Supplement: MOESM1 [file 26025700]

**Supplementary Materials for Haines et al., 2023**

**The Mindfulness-Based Kindness Curriculum (MBKC)--Diagram of Study Flowchart**

**Enrollment**

Invited To Participate (n = 250) None Excluded

Declined to Participate (n = 5)

Randomized by Classroom (n = 245)

# Allocation

Allocated to MBKC Intervention

- 10 classrooms assigned to MBKC (2 teachers with both am & pm classes)

**Teacher Training**

Allocated to Wait-List Control Group

- 6 classrooms assigned to curriculum as usual

Summer Training for MBKC Teachers (n = 15)

No Training for Wait-List Control Teachers (n = 15)

# Pre-Testing

MBKC children Completed Pre-Testing; Teacher-and Parent-report Pre-test Measures Collected (n = 143)

Wait-List Control Children Completed Pre- Testing; Teacher- and Parent-report Pre- test Measures Collected (n = 96)

**MBKC Intervention**

Intervention Classrooms Completed 24- lesson MBKC (10 classrooms)

Wait-List Control Classrooms Completed Curriculum as Usual (6 classrooms)

# Post-Testing

MBKC children Completed Post-Testing; Teacher- and Parent-report Post-test Measures Collected (n = 135)

Wait-List Control Children Completed Post- Testing; Teacher- and Parent-report Post- test Measures Collected (n = 91)

**Analysis***

Analyzed (n = 83-135) MBKC Children.

*Numbers vary with measures (e.g., TS Gold for only 4K students; lower return rate for parent measures)

Analyzed (n = 66-92) CAU Children.

*Numbers vary with measures (e.g., TS Gold for only 4K students; lower return for parent measures)

**A Mindfulness-Based Kindness Curriculum (MBKC) for Preschoolers (HMI, 2017)**

<https://hminnovations.org/well-being-tools#Kindness-Curriculum>

| Themes | **Lessons** | **Students will learn about…** |
| --- | --- | --- |
| Theme 1: Mindful Bodies & Planting Seeds of Kindness | L1: Mindful bodies and awareness of attention and breath  L2: Growing Seeds  L3: Growing friendship with Kindness | - Paying attention to inside breath and feelings - Paying attention on the outside (bell practice, needs of plants and people) - Noticing, giving, and receiving acts of kindness (Kindness Garden, Growing Friendship Wish) |
| Theme 2: I Feel Emotions on the Inside | L4: Quiet emotions on the inside  L5: I can notice things when I’m quiet on the inside  L6: Different emotions feel differently on the inside | - Engaging in self-care and finding safe, peaceful internal states (Belly Buddies) - Self-calming to notice sounds and feelings - Communicating feelings and that all feelings, even difficult ones, are helpful |
| Theme 3: How I Feel on the Inside Shows on the Outside | L7: Emotions on the inside show on the outside  L8: Working with emotions in a kind and friendly way  L9: Emotions change many times each day | - How their feelings show on their faces (Emotion Cards) - Asking about others’ feelings and understanding their feelings with kindness - Working out interpersonal problems |
| [Theme](#_bookmark14) 4: Taking Care of Strong Emotions on the Inside and Outside | L10: Busy mind and clear mind  L11: Making mind jars and practice using them  L12: What else can we do when we are upset? | - Calming a busy mind by focusing attention (Mind Jars) - Patience, waiting, and turn-taking - Using a safe place or activity to self-calm |
| [The](#_bookmark17)me 5: Calming and Working Out Problems | L13: Mindful movement  L14: Forgiving myself  L15: Forgiving Others | - Using movement to calm their emotions (Yoga Movements) - Forgiving themselves for accidents and mistakes - Forgiving others for accidents or unkind behavior |
| Theme 6: Gratitude | L16: Gratitude for people or things in my life  L17: Gratitude for my body  L18: Gratitude for other people | - People and things they are grateful for, and that gratitude feels good - Gratitude for their bodies and healthy, mindful eating. - Showing gratitude and kindness to others |
| Theme 7: All People Depend on Each Other and The Earth | L19: People around the world want peace  L20: Connections with others  L21: Caring for animals and insects | - How people around the world share a desire for peace. - People having different customs and languages - Caring for others and animals in big and small ways |
| Theme 8: Gratitude and Caring for Our World and Wrap-Up | L22: Gratitude and caring for our world  L23: Bringing it all together  L24: Wrap up | - Caring and gratitude for our world - Remembering the kindness “a (attention) to g’s (gratitude)” - Remembering to do what they learned, like self-calming, kindness to others |

**Teacher Training**

Expert mindfulness trainers affiliated with the Center for Healthy Minds (CHM), developers of the MBKC, taught the 26-hour training class over a two-week period to teachers randomly assigned to the MBKC condition. Our project employed two local experienced mindfulness coaches who also attended the training. Participants were paid $30.00/hour to attend the training. CHM trainers first introduced and trained participants in the cultivation of their own mindfulness practice, showing how the mindfulness practices paralleled lessons in the MBKC, and then taught participants how to implement the 24 MBKC lessons in their classrooms. Cultivation of teacher mindfulness practice included focus on self-care and well-being, and mindfulness coaches also explicitly offered individualized support for self-care as well as group mindful movement classes and teacher support meetings.Local coaches and CHM trainers were available to answer teachers’ questions and support them throughout MBKC implementation. Local coaches provided individual check ins on classroom progress, support for teachers’ personal mindfulness practice, and provided implementation support such as videos of MBKC songs with sign language.

**Fidelity Measures**

Teachers typically taught two MBKC lessons weekly and completed an adherence form. Each weekly form asked teachers to rate two of the 24 lessons on 9 -10 objectives, report on the amount of time spent on each lesson, and complete 4-5 open-ended questions. For example, the content of the adherence form for Lessons 5 and 6 of Theme 2 is listed below.

**THEME 2: I FEEL EMOTIONS ON THE INSIDE**

***Lesson 5:*** *I can notice things when I’m quiet on the inside.*

**Date of Lesson**: **Approximate length of lesson:**

For each lesson objective, teachers indicated either (0 = I did NOT introduce or address this objective)or rated the objective on a 7-point scale (1 = Introduced it, but did not explain or practice; 4 = introduced & provided some explanation & practice; 7 = introduced & provided detailed explanation and practice)

| *Lesson Objectives* |
| --- |
| 1. Introduced paying attention and being like an elephant. |
| 2. Introduced the concept of how it can be "noisy" on the outside but we can be quiet on the inside (*The Listening Walk* book). |
| 3. Introduced the bell, listening to the bell, and noticing quiet place on inside as we feel our breath. |
| 4. Introduced being on the farm and doing the listening walk (walk around room and quiet on the inside with attention to outside/inside). |
| 5. Introduced attention to animals sounds and freeze in place each time the bell sounds with *Sounds on the Farm*. |
| 6. Introduced feeling walk, paying attention to our bodies as we are still and when we walk (e.g., legs, feet). |
| 7. Introduced discussion with kids around feeling our bodies (provided kids with a model and asked for examples). |
| 8. Introduced concept: When we are quiet, we notice things |
| 9. Introduced concept: We can notice sounds and feelings |

**Open-Ended Questions**

1. How did this lesson go? What worked well in this lesson? What did you find to be particularly effective?
2. What was challenging? Did you notice anything that the children didn’t seem to understand or struggled with?
3. Did you modify or add anything?
4. What would you do differently the next time you implement this lesson?

**THEME 2: I FEEL EMOTIONS ON THE INSIDE**

***Lesson 6:*** *Different emotions feel differently on the inside.*

**Date of Lesson**: **Approximate length of lesson:**

| ***Lesson Objectives*** |
| --- |
| 1. Introduced inviting of the bell and discussion of seeds in the Kindness Garden and acts of kindness in the classroom. |
| 2. Introduced review exercise on noticing how you feel on the inside. |
| 3 Introduced "Quick as a Cricket" |
| 4. Introduced being: Bee - excited/calm, Basset - sad/heavy/relaxed/busy, Lark - happy/light/scared/flying, Tiger - brave/big/afraid, Shrimp - shy/small/afraid |
| 5. Introduced Feeling Walk back to rug and feel steps and bottoms when sitting |
| 6. Introduced E = Emotions and add to letters on wall. Introduce preferred and not preferred emotions via discussion. |
| 7. Introduced concept of how some emotions are preferred and others not, but all emotions are helpful. Discussion of why they are helpful. |
| 8. Introduced quieting of body and Belly Buddy with Breathing in, Breathing out song. |
| 9. Introduced concept: I can tell someone how I feel on the inside. |
| 10. Introduced concept: I like some feelings and don't like other feelings but all feelings are helpful. |

**Open-Ended Questions**

1. How did this lesson go? What worked well in this lesson? What did you find to be particularly effective?
2. What was challenging? Did you notice anything that the children didn’t seem to understand or struggled with?
3. Did you modify or add anything?
4. What would you do differently the next time you implement this lesson?
5. Are the activities in this week’s lessons similar to activities you do as part of your other programming or Pyramid programming? That is, do you think there is major overlap?

**Mindfulness Children’s Assessment Task Scale (MCATS)**

All items are illustrated and read aloud to children. Children are shown several examples to practice using the rating scale, and complete five sample items. Children point to their ratings on a visually-graduated rating scale. Stem question: I’m going to read this book and show you some pictures, and you can show me if you do these things sometimes, all of the time, or never.Items were delivered in a random order.

The Mindfulness task uses a9-pointscale:

1 2 3 4 5 6 7 8 9

I----------I----------I----------I----------I----------I----------I----------I----------I----------I

Never Sometimes Always

**Self-Mindfulness/Regulation Subscale: Open-hearted acceptance, nonjudgmental awareness, and participation in the present moment.**

1. Do you pay attention to what is happening around you?
2. Do you calm yourself by breathing?
3. Do you notice when your body feels tense or upset?
4. Do you talk to someone about how you feel? Who do you talk to?
5. Do you notice how your feelings change from moment to moment?
6. You may not like all feelings, but do you know that they are important?

**Self-oriented kindness (self-acceptance)**

1. When you are sad, are you kind and gentle with yourself?
2. Do you tell yourself it is OK to feel scared?
3. When you make a mistake, do you tell yourself it is OK?
4. Do you like your body and all you can do with it?

**Other-oriented kindness (other-acceptance)**

1. When someone elseis sad, do you try to help.
2. When a kid makes a mistake, like bumping into you, do you forgive them & try to work it out?
3. Do you ask other kids to play when they look sad or lonely?
4. Are you kind to others?
5. Do you tell others (e.g., parents, siblings, friends) that you care about them?
6. Do you play with kids even if they look different from you?
7. Are you kind to the earth and take care of it?

**Development and Pilot Testing of the MCATS**

The 17-item MCATS was constructed by modifying the Mindful Attention Awareness Scale Adapted for Children (originally designed for children in 4-7th grade; Lawlor et al., 2014) to better fit the preschool age and more specifically measure the constructs of interest taught in the MBKC, specifically, openhearted, nonjudgmental awareness and participation; kindness, compassion, and acceptance of self; and kindness, compassion, and acceptance of others. For example, the wording on the item, “Usually, I do not notice if my body feels tense or uncomfortable until it gets really bad” was simplified to “Do you notice when your body feels tense or upset?” for MCATS. Further, the MCATS has illustrations and practice items to help children understand and relate to the items, and to familiarize them with the rating scale. There is a follow-up question on item 4 (who do you talk to?) as another check of their understanding. The scale also has an optional section with three illustrated short scenarios that provide qualitative and quantitative data about how children handle challenging social interactions: 1) another child being teased, 2) being excluded from group play, and 3) accidentally hurting another child and the child yells at them.

Initial pilot testing was done with several 3- to 5-year-olds, and then at a public non-profit early learning center with a group of 20 preschool children (54.5% female, *M*age = 47.4 months (36 to 60 months), 86.4% White; 100% middle income), who completed the MCATS in the fall and again in the spring of the school year. The reliability analysis revealed acceptable reliability overall, with lower subscale reliability. Overall full-scale reliability, Cronbach’s α pre/post = 0.85/0.81; reliability for the three subscales: Self-Mindfulness/Regulation (SMR, Cronbach’s α pre/post = 0.58/0.49); Self-Oriented Kindness (SOK, Cronbach’s α pre/post = 0.65/0.40); and Other-Oriented Kindness (OOK, Cronbach’s α pre/post = 0.73/0.48). The full-scale reliability was good for the small sample size of very young children, though the subscale reliabilities were low to moderate. Further, in the pilot testing, we hypothesized no change in mindfulness skills over the school year as no mindfulness-based intervention was done. However, we found a significant increase on the Other-oriented Kindness subscale of the MCATS (*t*(19) = 2.162*, p* = 0.04), which may reflect promotion of positive social interactions in the high-quality preschool setting.
